# Supplementary material for: Assessing the prognostic scores for the prediction of the mortality of patients with acute-on-chronic liver failure: a retrospective study
Source: PeerJ. 2020 Sep 15;8:e9857. doi: 10.7717/peerj.9857 (PMC7500347; doi:10.7717/peerj.9857)
Supplement: Supplemental Information 1 [file peerj-08-9857-s001.xlsx]

## Sheet: Sheet1
Admission days	Name（number)	Sex（man=1,woman=2)	Age	Discharge date	Hospitalization days	Diagnosis（Hepatitis B cirrhosis=1；Alcoholic cirrhosis=2；Hepatitis B+Alcoholic cirrhosis=3;Schistosomiasis cirrhosis=4；Primary biliary cirrhosis=5；Hepatitis c cirrhosis=6；Cryptogenic cirrhosis=7；Autoimmune cirrhosis=8；others=9)	Etiology (HBV=1,HCV=2, alcohol =3, schistosoma =4, hepatitis b + alcohol =5, b + schistosoma =6, alcohol + schistosoma =7, autoimmunity = 8, unknown cause =9, hepatitis b + c =10, hepatitis b + alcohol + schistosoma =11, alcohol + schistosoma +Wilsons=12)	Whether the etiology is treated (0= untreated;1= antiviral therapy;2 = abstinence;Other = 3)	Causes of admission (ascites =1, varicose vein rupture hemorrhage =2 hepatic encephalopathy =3 infection =4, liver cancer rupture hemorrhage =5, ulcer hemorrhage =6, others =7)	Acute Decompensation（no=0、yes=1）	The degree of ascites（0=no；1=a little；2=middle weight；3=a large number of）	Hepatic encephalopathy during hospitalization（0=no；1=level 1；2=level 2；3=level 3；4=level 4）	AKI（0=no,1=yes）	Total bilirubin（umol/l）	分值	Renal creatinine（umol/l）	分值	Hepatic encephalopathy staging（0=no；1=level 1；2=level 2；3=level 3；4=level 4）	分值	INR	Blood platelet*10 9/L	分值	Systolic blood pressure(SBP)	Diastolic blood pressure(DBP)	mean arterial pressure (MAP)	Vasopressors(0=no 1=yes)	Mean arterial pressure (MAP)	分值	ACLF level（no=0,level 1=1,level 2=2,level 3=3）	Lactic acid	CO2 partial pressure(PCO2)	Partial pressure of oxygen(Po2)	White blood cell count（*109）	Albumin	ALT	AST	ALP	y-GT	BUN	Na	PT	HBV-DNA level（≤200=1，200–2×104=2，2×104–2×106=3，≥2×106=4）	HBeAg(negative=0，positive=1)	mechanical ventilation（no=0，yes=1）	renal replacement therapy（no=0，yes=1）	CTP	MELD=9.6 ×log e (creatinine[mg/dL])+ 3.8× log e (bilirubin [mg/dL])+ 11.2×log e (INR)+6.4	iMELD	MELD Na
1	1	1	60	2015-01-11 07:00:00	4	2	3	0	2	1	1	0	0	46.6	2	133.5	1	0	0	1.98	64	3	91	69	76.3333	1	280	2	1	11.3	15.7	89.5	9.93	20.1	21	84	56	18	18.9	141	23.7	0	0	0	0	11	15	34.3	15
1	2	2	73	2015-01-13 09:48:00	11	1	1	1	7	0	3	0	1	14.1	0	234.2	2	0	0	1.21	113	1	103	69	80.3333	0	318	1	1	1.8	24	66.8	10.5	30.7	20	56	71	32	16.1	137	14.4	4	0	0	0	8	18	44	18
1	3	2	60	2015-01-15 14:57:00	1	4	4	0	3	1	2	4	0	24.9	1	381.6	3	4	4	1.82	54	3	0	69	46	1	392	1	3	6.9	40.8	167	28.8	20.6	578	1395	127	107	19.8	141	21.9	0	0	1	0	13	29	48.3	29
1	4	1	48	2015-03-15 19:35:00	0	1	1	0	2	0	0	0	0	12.2	0	184	2	0	0	1.78	76	3	112	69	83.3333	1	662	0	2	6.3	20.8	139	28.34	27	62	94	—	—	18.4	138	20.1	—	0	1	0	9	20	37.8	20
1	5	2	71	2015-04-06 14:17:00	5	6	2	0	3	1	3	1	0	9.5	0	124	1	1	1	1.61	62	3	87	69	75	1	362	1	1	1.9	29.6	76	4.19	26.2	16	66	75	9	4.3	127	19.3	0	0	0	0	12	15	47.4	27.72
1	6	1	37	2015-04-24 20:30:00	11	1	1	1	4	1	2	4	0	447.3	4	49	0	3	3	1.64	49	3	105	69	81	0	297	2	2	2.2	25.8	62.4	2.66	30.9	12	45	116	70	2.3	138	18.1	0	0	0	0	13	24	38.5	24
1	7	1	60	2015-05-27 09:00:00	11	2	3	0	2	1	2	3	0	93.2	2	72.1	0	3	3	1.71	12	4	133	69	90.3333	0	362	1	2	5.3	25.7	104	9.82	26.9	90	307	134	249	11	140	18.8	0	0	0	0	15	12	32	12
1	8	2	57	2015-07-31	16	5	8	0	4	1	0	0	0	262.9	4	268.7	2	0	0	1.17	5	4	142	69	93.3333	0	386	1	3	3	29.4	55.1	32.83	19.7	50	77	311	112	36.7	143	13.7	0	0	1	0	9	23	40	23
1	9	1	45	2015-07-31	3	1	1	0	2	1	0	2	0	14.6	0	78.1	0	2	2	1.19	38	1	97	69	78.3333	1	461	0	1	1.2	24.1	101	2.4	25.6	26	29	47	9	10.9	138	13.9	0	0	0	0	8	8	24.9	8
1	10	2	60	2015-07-30	1	1	1	0	2	1	0	0	0	6.7	0	190.3	2	0	0	1.22	70	1	111	69	83	0	315	1	1	0.9	27.4	108	15.13	18.2	151	229	42	7	18.8	135	14.8	0	0	1	0	7	16	39.5	16
1	11	1	60	2015-08-11	3	1	1	0	4	1	3	0	0	215.2	4	91.9	0	0	0	3.11	11	4	138	69	92	0	123	3	3	6.2	25.1	54.8	14.06	31.6	707	584	393	627	21.7	145	35.1	—	0	1	0	12	29	45.5	29
1	12	1	52	2015-10-31	1	2	3	2	4	1	0	0	0	53.1	2	176	1	0	0	1.33	40	2	85	69	74.3333	1	114	3	3	11.4	21.9	80.7	1.3	—	74	222	—	—	7	141	15	0	0	1	0	？	14	30.9	14
1	13	1	43	2015-01-27 14:00:00	3	3	5	0	4	1	1	0	0	174	3	148.3	1	0	0	1.65	17	4	120	69	86	0	218	2	1	1.7	24	63.3	11.22	20.7	18	57	201	76	22.4	130	19.3	0	0	0	0	12	26	47.9	33.95
1	14	1	64	2015-02-16 10:00:00	14	2	3	0	2	1	0	2	0	58.8	2	48.5	0	2	2	3.98	58	4	122	69	86.6667	0	325	1	1	3.6	31.8	117	7.04	20.3	30	58	63	17	9.4	144	45.1	0	0	0	0	12	20	38.4	20
1	15	2	59	2015-03-06 08:49:00	11	1	1	0	2	1	0	0	1	44.1	2	127.9	1	0	0	1.23	13	4	77	52	60.3333	1	386	1	2	1.4	29.3	95.7	1.84	23	18	32	31	8	9.8	140	10.1	0	0	0	0	8	16	35.7	16
1	16	1	34	2015-03-07 18:32:00	0	1	1	0	2	1	0	4	0	32.7	1	68.6	0	4	4	2.16	92	3	37	12	20.3333	1	365	1	2	14.1	22.5	189	1.28	—	—	—	—	—	—	—	—	—	—	—	—	—	—	—	—
2	17	1	58	2015-04-03 22:51:00	6	3	5	1	2	1	2	0	0	232.1	4	172.1	1	0	0	1.19	197	1	104	67	79.3333	0	350	0	1	3	35.4	73.5	6.64	28.4	122	449	194	193	15.6	132	13.4	0	0	0	0	10	25	50	29.77
2	18	1	49	2015-05-04 07:00:00	7	2	3	0	3	1	1	1	1	13	0	92.8	0	1	1	1.71	43	3	129	86	100.333	1	128	0	1	2.3	33.6	37	2.53	22.3	27	32	58	224	6.5	141	19.3	0	0	0	0	11	6	22	6
1	19	1	47	2015-05-25 14:59:00	1	2	3	0	2	1	1	0	0	39.9	2	359.2	3	0	0	1.52	50	3	109	76	87	0	421	0	1	1.4	22.9	109	2.11	23.4	36	168	111	347	13.9	122	17.2	0	0	0	0	10	21	49.7	41.67
2	20	2	77	2015-08-04 10:00:00	8	1	1	0	4	1	0	0	0	43.3	2	160.5	1	0	0	1.55	129	3	138	63	88	0	192	3	1	1.9	26.5	74.2	9.6	26.3	27	44	73	199	11.8	141	16	3	0	0	0	8	21	45.4	21
1	21	1	65	2015-08-20 13:20:00	4	3	5	0	2	1	3	3	0	131.1	3	143.4	1	3	2	1.55	86	3	148	90	109.333	0	246	2	1	2	27.5	84.4	20.38	23.7	27	44	67	16	20.4	152	17.5	0	0	1	0	14	24	37.1	24
1	22	1	46	2015-09-30 07:00:00	7	2	3	0	3	1	0	2	0	15	0	76.3	0	2	2	1.28	31	2	91	55	67	1	325	1	1	1	31	94.4	3.73	30.3	57	73	75	350	6.8	130	14.5	0	0	0	0	7	3	25.8	10.95
1	23	1	57	2015-10-04 08:50:00	2	3	5	0	2	1	2	2	0	26.6	1	77.8	0	2	1	1.64	67	3	96	54	68	1	104	3	2	29	20.8	94.4	4.36	19.5	15	43	57	21	7.7	143	16.7	0	0	1	0	11	14	31	14
1	24	1	28	2015-12-21 09:24:00	17	1	1	0	2	1	0	0	0	14.9	0	71.8	0	0	0	1.12	35	1	93	47	62.3333	1	172	3	2	0.8	34.4	102	3.39	27.2	23	26	45	17	4.4	136	13.1	2	0	0	0	7	8	21.2	8
5	25	1	45	2015-12-22 07:19:00	6	3	5	0	2	1	1	1	0	47	2	20	0	1	1	1.72	61	3	106	69	81.3333	1	397	1	1	2.8	34.8	131	6.64	—	47	142	—	—	4.9	142	20.4	0	0	0	0	—	—	—	—
1	26	1	56	2016-01-02 17:00:00	10	1	1	1	2	1	1	0	0	367.6	4	468.9	4	0	0	1.27	118	2	124	90	101.333	1	409	0	3	4.3	31.7	159	13.65	22.9	73	294	599	268	13.1	130	14.8	2	0	0	0	10	37	62.8	44.95
1	27	1	43	2016-01-04 07:00:00	12	2	3	0	2	1	0	2	0	109.8	3	151.4	1	2	2	1.65	213	3	76	50	58.6667	0	281	2	1	11	24.7	125	50.51	25.2	376	1372	144	316	12.9	140	19.9	0	0	0	0	12	18	32.9	18
1	28	1	58	2016-01-06 07:00:00	11	7	9	0	2	1	1	3	0	26.9	1	25.6	0	3	2	1.16	78	1	104	69	80.6667	1	411	0	2	5.6	32.1	139	3.86	33.4	29	31	73	42	5.6	122	13.1	?	0	0	0	9	10	42	30.67
1	29	1	59	2015-12-31 10:30:00	3	3	5	0	2	1	0	4	0	20.3	0	62.1	0	4	4	1.32	62	2	130	75	93.3333	1	411	0	2	5.4	29.3	112	5.67	23.8	282	643	69	83	24.1	131	15.9	3	1	1	0	9	10	36	16.36
2	30	1	50	2016-01-03 15:37:00	5	4	4	0	2	1	0	4	0	17.4	0	165.9	2	4	4	1.57	30	3	135	87	103	0	159	3	2	2.8	29.3	103	7.89	13.4	18	50	39	12	26.4	146	17.7	0	0	0	0	10	18	30.8	18
1	31	1	66	2016-01-20 07:00:00	13	1	1	1	2	1	2	2	0	15.5	0	122.8	1	2	2	1.58	176	3	118	64	82	1	415	0	1	4.2	26.9	28.5	8.73	27.8	15	27	86	18	2.8	128	13.6	0	0	0	0	10	15	45.2	26.13
7	32	1	57	2016-02-01 12:35:00	11	1	1	1	3	1	2	2	0	35.9	2	107.7	1	2	2	1.17	80	1	127	88	101	0	199	3	1	3	25.4	53.3	6.53	28.8	24	40	103	39	9.4	140	13.7	0	0	0	0	10	13	32.1	13
1	33	1	53	2016-02-20 07:30:00	9	2	3	0	2	1	2	0	1	67.9	2	232.5	2	0	0	1.45	79	2	117	72	87	0	414	0	1	1.7	27.4	106	6.74	21.9	36	72	100	156	41.5	135	16.4	0	0	0	0	12	19	40.4	19
1	34	1	30	2016-03-10 07:00:00	13	3	5	0	2	1	0	0	0	42.5	2	50.4	0	0	0	1.73	73	3	83	55	64.3333	1	147	3	2	1.8	26.9	60.4	6.77	30	14	31	63	21	2.6	142	19.5	0	0	0	0	9	16	25.6	16
1	35	1	78	2016-04-03 12:30:00	3	4	4	1	2	1	0	0	0	71.4	2	185.3	2	0	0	1.71	22	3	117	53	74.3333	0	280	2	1	1.6	36	60	5.25	24	343	500	47	24	29.8	147	19.9	0	0	0	0	11	25	45.5	25
1	36	2	52	2016-04-03 07:00:00	2	1	1	0	2	1	1	0	0	126.3	3	78.2	0	0	0	2.14	26	3	116	57	76.6667	1	120	2	2	5.4	18	49.4	10.19	22.8	28	41	94	10	12.8	137	21.9	0	0	1	0	12	23	42.7	23
2	37	1	46	2016-04-25 11:00:00	3	1	1	1	2	1	2	0	0	27.1	1	44.7	0	0	0	1.36	67	2	115	66	82.3333	1	180	3	2	1.1	27.1	175	2.28	31.3	25	223	171	232	6.9	136	15.4	0	0	0	0	8	12	30.6	12
1	38	1	72	2016-05-05 22:20:00	1	1	1	1	2	1	3	3	0	79.5	2	132.6	1	3	3	2.21	130	3	133	88	103	1	32.3	4	3	11.5	17.9	47.3	25.49	24.7	899	1507	156	37	17.2	152	21.2	0	0	0	0	15	25	40.2	25
2	39	2	46	2016-05-13 11:30:00	8	7	9	0	2	1	0	0	0	18.8	0	6.3	0	0	0	1.58	20	4	59	30	39.6667	1	417	0	2	1.5	17.4	121	2.06	29.5	14	39	92	16	8.1	141	13.9	0	0	0	0	6	12	27.1	12
1	40	2	78	2016-05-20 10:30:00	2	1	1	1	2	1	3	4	0	22.5	1	117.1	1	4	0	1.72	78	3	163	69	100.333	0	176	0	2	2.6	72.1	25.5	15.25	32.1	14	27	70	18	14.2	149	19.4	_	0	0	0	12	16	35.1	16
2	41	1	42	2016-06-02 18:50:00	1	1	1	1	2	1	0	0	0	32.9	1	78.4	0	0	0	7.01	18	3	96	69	78	0	200	0	2	18	200	38.8	10.67	15	3629	6710	399	11	15.9	134	23.2	_	0	1	0	9	31	49.8	32.59
2	42	2	76	2016-07-04 07:37:00	13	1	9	0	3	1	0	3	0	41.6	2	93.2	0	3	3	1.52	19	4	94	69	77.3333	1	593	0	3	1.8	30.9	131	10.73	24.3	22	33	231	142	8.7	140.1	17.2	0	0	0	0	11	15	39.73	15
1	43	1	66	2016-08-29 09:17:00	4	1	1	0	2	1	3	0	0	14.1	0	147.4	1	0	0	1.27	136	2	122	69	86.6667	1	334	1	1	1.9	34.1	103	7.26	29	263	76	116	148	4.5	130.9	13.1	0	0	0	0	8	14	42.17	20.52
2	44	2	54	2016-09-12 07:00:00	15	1	1	1	2	1	3	0	0	8.6	0	65	0	0	0	1.42	9	4	112	69	83.3333	1	356	1	2	1.5	31.1	102	0.84	34.2	13	19	61	12	12.6	139.9	13.9	0	0	0	0	8	10	28.27	10
2	45	2	54	2016-09-30 07:00:00	12	1	1	1	2	1	2	0	0	5.6	0	95.8	0	0	0	2.67	31	4	110	69	82.6667	1	564	0	2	6.8	30.7	163	8.48	24	261	495	60	10	12.9	146.2	30.5	4	0	0	0	11	18	31.86	18
4	46	1	42	2016-10-08 12:04:00	4	1	1	1	2	1	2	3	0	70.3	2	67.5	0	3	3	1.56	63	3	124	69	87.3333	1	422	0	2	3.3	24.7	122	3.59	24.7	58	323	233	60	7.6	99	18.1	_	0	0	0	14	17	60.3	74.24
4	47	1	52	2016-10-12 10:00:00	4	2	3	2	2	1	3	4	1	86.4	2	294.4	2	4	4	2.13	37	3	96	69	78	1	358	1	3	5	32.2	75.2	4.31	22.8	36	58	150	94	17.7	134.6	23.9	0	0	1	0	15	26	47.38	26.64
6	48	1	78	2016-10-21 07:11:00	7	3	5	2	4	0	2	0	1	9.7	0	185.8	2	0	0	1.29	178	2	107	69	81.6667	0	209	2	1	1.1	31	44	7.75	34.5	9	20	90	39	20.7	132.9	13.8	0	0	0	0	8	16	46.37	19.34
1	49	2	69	2016-11-02 18:31:00	10	5	8	0	2	1	1	4	0	121.8	0	263.1	0	4	4	3.69	82	2	153	69	97	1	452	0	3	1.9	30.2	131	5.58	33.8	64	66	86	175	8.7	136.3	40	0	0	1	0	12	39	64.29	39
1	50	2	68	2016-10-24 14:00:00	1	1	1	0	2	1	3	0	0	8.2	0	49.3	0	0	0	3.46	4	4	75	69	71	1	242	2	2	13.6	50.1	70.2	2.35	31.7	550	1585	63	12	5.9	155.4	40.4	0	0	1	0	10	20	31.62	20
1	51	1	65	2016-10-27 17:35:00	0	1	1	1	4	1	0	0	1	635.8	4	267.1	2	0	0	2.52	3	4	71	69	69.6667	1	629	0	3	3.1	27.7	132	21.9	—	250	514		—	—	134	25.4	0	0	0	0	—	—	—	—
2	52	2	68	2016-11-14 19:43:00	0	1	1	1	2	1	1	4	0	26.3	1	71.9	0	4	4	1.68	78	3	144	69	94	1	228	1	2	10.5	24.7	137	1.04	23.5	48	67	53	24	12.2	147	23.6	0	0	1	0	12	14	31.5	14
1	53	1	39	2017-01-05 07:00:00	16	1	1	2	1	1	3	3	0	162.4	3	105.5	0	3	3	2.79	25	4	108	69	82	0	355	1	2	4.6	32.7	74.5	11.02	16.4	25	109	96	10	7.1	137.9	36	?	1	0	0	15	28	43.17	28
1	54	1	49	2016-12-24 09:30:00	2	2	3	1	2	1	3	0	1	501.1	4	805.6	4	0	0	2.14	195	3	84	69	74	1	540	0	3	5.5	18.2	157	31.36	22.4	51	81	198	126	33.3	130.6	24.1	0	0	0	0	13	42	65.28	49
1	55	2	70	2017-01-05 09:00:00	7	7	9	0	3	0	2	3	0	15.9	0	169.1	1	3	3	1.13	75	1	159	69	99	0	396	1	1	1.3	30.7	131	5.82	39.2	8	28	95	16	4.91	140.3	12.8	0	0	0	0	9	14	36.79	14
1	56	2	74	2017-01-04 01:00:00	1	7	9	0	2	1	1	0	0	13.7	0	127.2	1	0	0	2.64	81	4	130	69	89.3333	0	161	3	2	20	25.4	33.8	16.13	—	198	452	—	—	17	143.2	29.8	0	0	0	0	—	—	—	—
1	57	1	78	2017-01-16 07:00:00	11	9	9	1	4	0	0	0	0	506.7	4	180.6	2	0	0	1.76	60	3	94	69	77.3333	0	223	2	2	2.9	36	?	21.06	27.4	56	92	204	113	19.5	132.1	19.9	0	0	0	0	11	32	62.93	36.61
1	58	2	50	2017-01-25 07:00:00	14	5	8	0	4	1	2	0	1	220.2	4	443	4	0	0	2.06	18	4	92	69	76.6667	0	107	3	3	1.3	29.4	33.3	15.75	31.4	456	422	222	101	35.4	132.2	23.2	0	0	0	0	12	33	55.46	37.45
1	59	1	68	2017-01-24 07:00:00	12	3	5	2	2	1	0	0	0	17.2	0	136.3	1	0	0	1.4	104	2	141	69	93	1	479	0	1	3.9	28.1	139	11.12	30.1	51	82	71	51	18.4	139.3	15.8	0	0	0	0	6	14	36.89	14
1	60	1	49	2017-01-16 15:25:00	3	2	3	2	4	1	2	4	0	34.8	2	72.9	0	4	4	2.19	63	3	129	69	89	1	177	3	3	6.4	17.8	65.6	6.4	19.6	20	169	101	33	6.6	141.6	24.6	0	0	1	0	14	11	29.58	11
1	61	2	54	2017-01-25 23:25:00	5	4	4	0	2	1	0	2	0	24.2	1	89.2	0	2	2	1.1	115	1	124	69	87.3333	1	459	0	1	2.2	32.7	133	15.35	28.8	12	23	50	18	17.3	145.5	12.5	0	0	1	0	7	9	23.35	9
1	62	1	54	2017-01-27 07:00:00	6	3	5	1	2	1	0	4	0	37.3	2	156.7	1	4	4	1.95	192	3	150	69	96	0	722	0	1	4.6	22.7	152	18.36	23.7	18	35	46	6	8.2	136.4	22	0	0	0	0	12	22	42.72	22
2	63	1	49	2017-02-06 10:22:00	2	1	1	1	3	1	0	4	1	57.2	2	1302	4	4	4	1.37	95	2	157	69	98.3333	0	463	0	2	1.2	17	134	5.63	29.3	12	21	71	22	73.5	134.8	12.9	0	0	0	0	10	40	60.34	40.32
2	64	1	65	2017-03-06 07:00:00	9	7	9	0	1	1	2	2	0	46.5	2	67.6	0	2	2	1.42	36	2	112	69	83.3333	1	424	0	1	2.4	32.3	147	6.99	26.3	22	31	61	16	12	133.4	16.1	0	0	0	0	12	14	40.12	16.54
1	65	1	76	2017-03-15 14:40:00	1	1	1	0	2	1	0	0	0	21	1	156.5	1	0	0	1.37	63	2	110	69	82.6667	1	423	0	1	3.9	28	124	6.97	23.6	23	30	72	11	23.9	139.1	14.1	_	0	0	0	7	16	41.43	16
2	66	1	55	2017-04-02 08:35:00	17	1	1	1	2	1	0	2	2	17	0	61.2	0	2	2	2.91	16	4	95	69	77.6667	1	549	0	2	13.1	24.4	207	13.57	18.9	113	536	52	15	5.6	143.4	16.4	0	0	0	0	10	18	34.12	18
1	67	1	55	2017-03-18 11:25:00	1	1	1	0	2	1	0	0	1	26.3	1	101.3	0	0	0	5.58	33	4	68	69	68.6667	1	221	2	2	17	34.9	46.3	8.71	16.3	845	1240	36	11	14.1	154.8	22.9	0	0	1	0	9	29	37.14	29
13	68	1	46	2017-03-21 22:15:00	3	3	5	0	2	1	2	4	1	128.3	3	118.1	1	4	4	2.56	108	4	156	69	98	0	639	0	2	6.8	25.3	134	18.82	26.2	27	50	161	80	9.5	157.3	28.9	0	0	0	0	15	27	30.69	27
2	69	1	76	2017-04-29 12:10:00	4	1	1	0	2	1	0	3	0	37.7	2	74.8	0	3	3	1.28	93	2	125	69	87.6667	1	329	1	2	1.3	31.6	62.6	14.89	25.4	17	29	168	40	5.5	142	14.5	_	0	1	0	10	12	35.4	12
2	70	2	73	2017-06-02 22:30:00	14	7	9	0	2	1	3	3	0	259	4	209.9	2	3	3	1.7	110	3	110	69	82.6667	1	464	0	3	1.6	26.2	153	14.05	27.4	43	94	154	42	37.1	136.7	19.2	0	0	0	0	15	31	57.21	15
1	71	2	71	2017-07-10 10:02:00	13	7	9	0	2	1	0	3	0	30.8	1	95.8	0	3	3	1.45	33	2	116	69	84.6667	1	130	3	3	2.6	23.9	37.8	8.05	31.3	17	36	136	15	11.9	142.8	12.9	0	0	0	0	8	14	35.34	14
1	72	1	41	2017-07-03 09:23:00	3	1	3	0	2	1	0	2	0	29	1	62	0	2	2	1.38	17	4	134	69	90.6667	0	215	2	1	2.2	33.4	45.1	3.9	30.8	63	358	57	302	6.1	137.7	12.8	0	0	0	0	7	12	27.91	12
6	73	1	64	2017-07-09 00:30:00	1	1	3	0	2	1	2	4	0	213	4	190	2	4	4	2.14	197	3	102	69	80	1	397	1	3	14.5	48.3	83.4	20.48	13.2	85	500	183	29	5.3	133.8	14.7	0	0	1	0	14	25	50.54	26.9
7	74	1	43	2017-12-10	10	1	1	1	2	1	3	0	0	137.8		51.5		0		2.68	50		82	55	64	1	539		2	4	29.4	113	4.05	26.3	40	81	113	31	15.6	125.8	29	_	0	0	0	13	25	49.84	39.63
1	75	2	62	2018-04-13	15	5	8	0	3	1	3	2	0	312.6		294.9		2		3.56	148		93	59	70.33	0	416		3	4.5	21.6	87.3	19.94	26.3	27	71	348	184	16.6	124.2	42.4	0	0	0	0	14	37	68.66	54.17
6	76	2	33	2018-02-10	5	1	1	0	2	1	2	0	0	323.8		35.8		0		1.7	343		102	56	71.33	1	625		2	4.2	13.9	131	17.48	22.3	30	51	138	25	16.6	132.4	25.2	_	0	0	0	13	23	40.22	27.13
1	77	1	46	2018-08-10	4	1	1	0	2	1	0	2	0	300.3		66.4		2		2.24	30		108	79	88.67	0	282		1	2.7	29.7	59.3	3.92	28.8	29	57	83	40	4.7	126.8	24.4	5.33*10^7	1	0	0	11	26	51	39.04
2	78	1	38	2018-08-17	7	1	1	0	2	1	0	2	0	34.2		59.7		2		1.62	19		97	61	73	0	311		1	2.8	26.6	156	1.33	21	21	40	44	6	9.7	144.2	17.8	8.1*10^3	1	1	0	10	14	24.46	14
4	79	2	44	2017-08-19	1	1	1	1	2	1	3	4	1	121.2		79.6		4		3.07	53		117	60	79	1	340		3	6.5	22.6	98.5	17.28	25.2	188	265	75	26	12.1	144.2	33.9	4.51*005	0	1	0	15	26	38.26	26
1	80	1	67	2017-08-19	1	2	3	0	2	1	3	4	0	14		146.7		4		1.32	50		92	55	67.3333	1	337		2	18	22.7	211	6.65	27.4	14	29	56	48	19.7	139.9	14.8		0	1	0	11	14	36.17	14
1	81	1	52	2017-10-28	1	2	3	0	2	1	3	3	1	58.1		165.5		3		3.1	82		60	41	47.33	1	362		3	22	30.3	145	80.86	24	1600	5820	158	230	11.2	148	35	—	0	1	0	15	23	35	23
1	82	1	62	2017-11-05	1	2	3	0	2	1	2	4	1	116.1		174.8		4		2.6	57		109	59	75.67	1	493		3	5.2	15..3	143	8.3	31.8	396	2198	126	135	11	130.9	29.4	—	0	1	0	14	24	50.97	30.5
1	83	1	53	2018-01-01	1	1	1	1	1	1	3	0	0	27.2		56.8		0		1.73	7		127	78	94.33	1	267		2	3	28.3	56	3.22	21.8	28	153	114	42	4.4	129	19.9	—	0	1	0	11	14	39.6	23.54
2	84	2	72	2018-01-16	1	1	1	0	2	1	2	4	0	50.2		539.4		4		1.59	81		128	59	82	0	331		2	3.3	23.7	95.9	8.95	21.2	34	105	73	18	28.1	133.1	18.6	_	0	0	0	14	33	61.43	36.02
1	85	1	51	2018-02-01	1	2	3	0	2	1	1	0	0	38.7		289.8		0		3.67	45		104	50	68	1	300		3	12.5	25.5	150	13.62	19	764	59	93	66	14	130.4	40.4	_	0	1	0	11	29	53.02	36.31
9	86	1	57	2018-04-06	2	1	1	1	2	1	2	0	1	203.4		650.6		0		1.74	83		98	68	78	1	512		3	2.9	21.5	108	27.38	24	67	160	654	93	57.3	122.4	20.4	_	0	1	1	13	41	72.42	61
1	87	1	42	2018-06-01	9	1	1	1	2	1	3	0	0	56.6		72.8		0		1.47	44		106	58	74	1	156		2	3.1	30.1	78.2	3.57	30.6	10	21	40	14	12	141.1	16.9	0	0	1	0	11	15	28.83	15
6	88	1	50	2018-06-16	9	1	1	1	1	1	2	0	0	15.6		51.9		0		1.46	211		122	85	97.33	1	63.2		2	14.5	73.5	13.3	12.94	23.8	27	59	243	50	8.4	128.8	17.1	0	0	1	0	10	11	35.84	20.86
1	89	1	51	2018-07-11	4	2	3	0	3	1	0	3	0	95.9		79.8		3		1.4	64		111	75	87	1	356		2	3.1	22.8	74.7	6.63	23.7	18	41	178	469	9.2	138.3	15.5	_	0	1	0	11	10	28.49	10
4	90	2	70	2018-08-14	31	6	2	0	2	1	2	3	0	72.3		108		3		1.45	38		155	88	110.33	1	383		2	6.7	24.6	111	6.69	30.5	21	54	86	19	9.2	128.6	16.9	0	0	1	0	13	18	48.98	28.176
3	91	2	43	2018-09-03	1	3	5	0	2	1	2	2	0	203.6		71.6		2		1.51	62		93	48	63	0	509		1	4.1	29.3	107	6.25	36.3	56	151	237	263	6.7	134	17.7	1.84*10^5	1	0	0	11	20	39.1	21.59
8	92	1	65	2018-06-30	2	3	5	0	2	1	0	0	0	23.3		61.9		0		2.45	17		52	25	34	1	406		2	2.1	27.8	85.2	9.35	18.9	23	55	43	11	7.6	143.5	28.9	0	0	0	0	9	18	37.05	18
1	93	1	51	2018-10-23	3	1	1	0	3	1	3	3	0	257.2		97.2		3		2.83	18		98	60	72.67	1	178		3	6	30.3	51.5	8.86	26.8	192	231	53	40	9.6	134.6	32.8	2.85*10^5	1	1	0	15	29	50.08	29.64
1	94	1	54	2018-12-31	1	2	3	1	2	1	3	4	0	28		64.4		4		1.97	67		95	64	74.33	1	468		2	7.7	19.8	136	11.13	21.4	11	29	47	14	5.8	141.6	21.5	0	0	1	0	13	9	26.08	9
2	95	2	68	2018-01-08	14	4	4	0	1	1	3	3	0	25.6		173.6		3		1.33	99		149	92	111	0	200		2	1.2	29.3	82.2	11.4	23.4	48	68	285	149	19.1	127	15	0	0	1	0	11	18	49.5	30.72
3	96	2	54	2018-12-27	17	7	9	0	3	1	0	3	0	129.8		171		3		1.42	26		127	80	95.67	1	219		2	3.2	33.7	219	5.64	25.8	159	606	405	199	9.8	144	16.5	0	0	1	0	12	24	39.4	24
3	97	1	57	2018-01-09	1	1	1	1	3	1	1	3	1	99.8		319.3		3		2.82	76		153	101	118.33	1	119		3	5.3	36.9	71.7	1.4	20.7	73	255	31	10	31.4	151.1	31.4	0	0	1	0	14	37	48.33	37
3	98	1	71	2018-11-01	6	1	1	1	2	1	2	0	0	18.5		145.8		0		1.21	125		112	61	78	1	169		2	2.5	30	84.3	5.46	37.6	28	29	112	46	14.9	132.3	13.9	0	0	1	0	7	14	42.69	18.29
1	99	2	59	2018-03-08	1	7	9	0	2	1	3	3	0	62.7		38.8		3		2.24	220		118	59	78.67	0	162		2	9.8	15.1	66.5	20.83	19.8	52	202	298	225	6.2	142.8	26	0	0	0	0	15	20	37.74	20
2	100	1	55	2018-05-08	1	3	5	1	2	1	2	0	0	27.6		65.4		0		1.87	65		56	30	38.67	1	148		2	9.1	34.2	42.9	4.43	21.6	21	26	81	12	6.5	134.7	21.5	3.61*10^2	0	1	0	11	15	37.21	15.48
6	101	2	69	2018-06-11	15	7	9	0	3	1	2	4	0	30.6		190.1		4		1.54	57		89	49	62.33	1	369		3	3.6	24.1	295	9.01	22	26	38	145	215	20.6	153.3	17.7	0	0	1	0	12	21	34.39	21
7	102	1	82	2018-08-02	1	7	9	0	1	1	3	0	0	99.6		199.9		0		3.96	56		93	50	64.33	1	270		3	5.1	38.9	56.8	9.54	28.2	61	229	77	19	21.9	139.4	45.9	0	0	1	0	12	36	63.02	36
[truncated: 10 more columns]
